# Supplementary material for: Modified polyurethane nanofibers as antibacterial filters for air and water purification
Source: Royal Society of Chemistry journal article supplement (doi:10.1039/c7ra06317b), 2017-01-01
Supplement: c7ra06317b1.pdf [file c7ra06317b1.pdf]

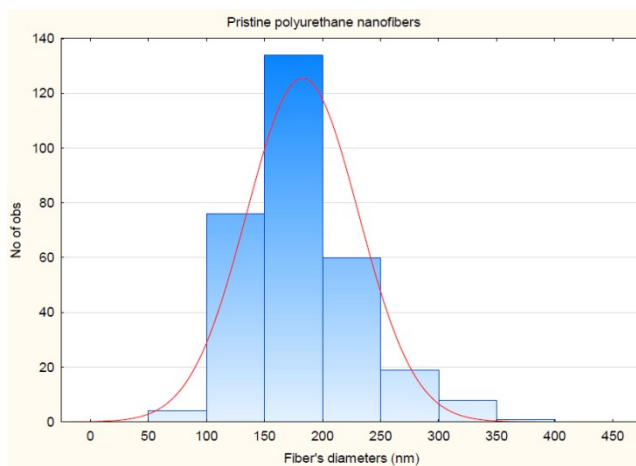

Figure 1s. Diameter distribution of pristine PU nanofibers

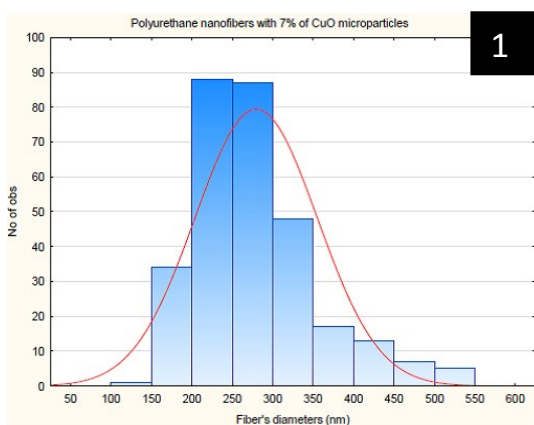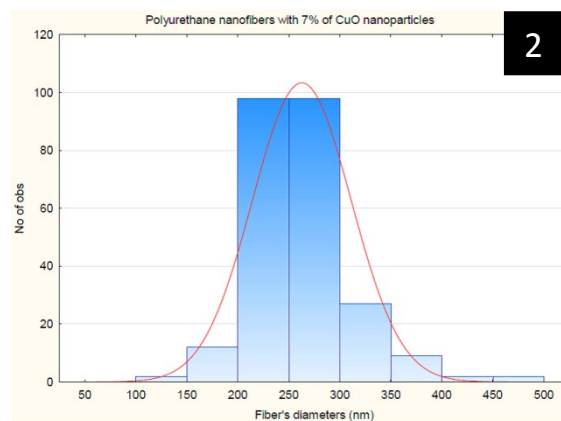

Figure s2. Diameter distribution: 1 - PU + 5% CuO micro; 2 - 5% CuO nano

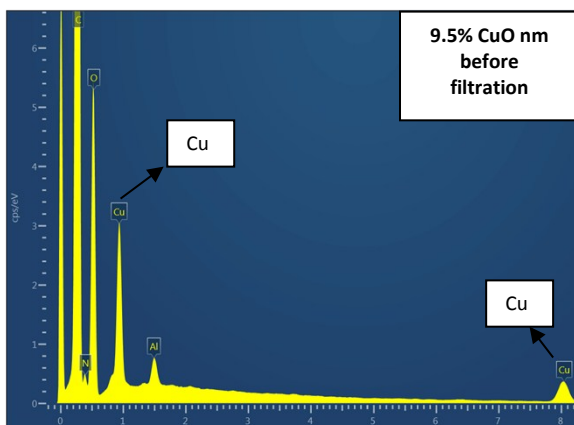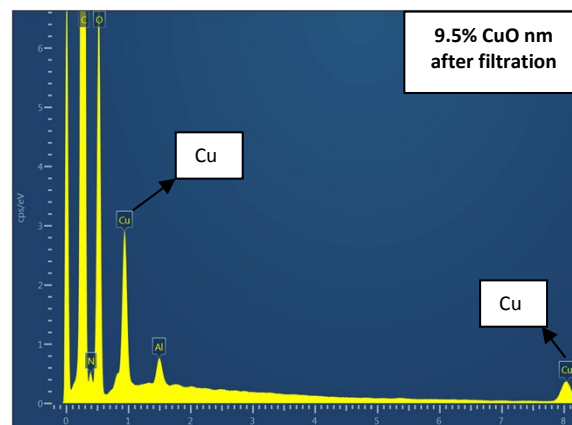

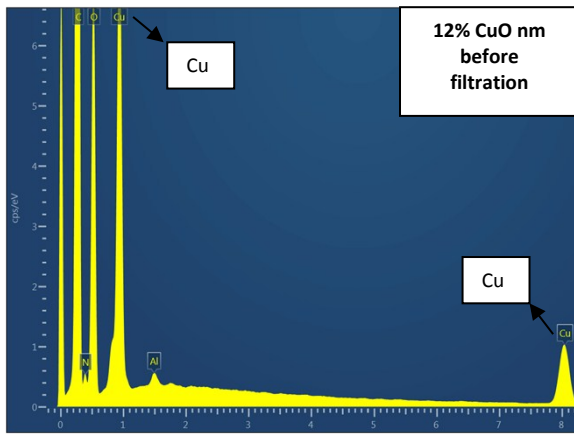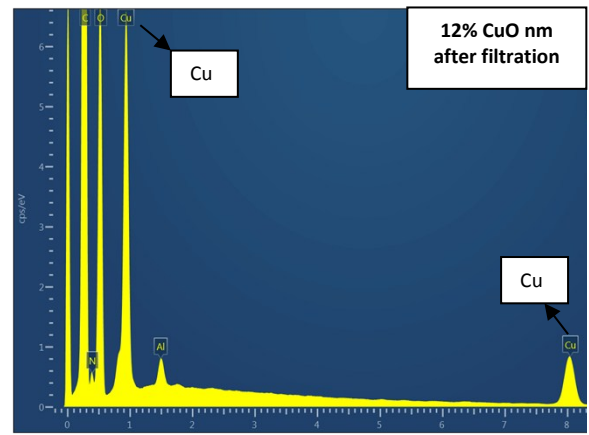

Figure s3. SEM-EDX images of areas of PU NFs with 9.5% and 12% of CuO NPs before and after water filtration test
